# Supplementary material for: Pre-Referral Primary Care Blood Tests and Symptom Presentation before Cancer Diagnosis: National Cancer Diagnosis Audit Data
Source: MDPI journal article supplement (doi:10.3390/cancers15143587), 2023-07-12
Supplement: s1 [file s1]

## Supplementary File

**Table S1:** Assignment of symptoms for supplementary analysis:

| 0.01 – 0.99% PPV<br>(n=12)                                                                                                                                                                                                                                                                                                                    | 1 – 1.99% PPV<br>(n=13)                                                                                                                                                                                                                                                                                       | 2 - 2.99% PPV (n=5)                                                                                                     | PPV 3 - 4.99%<br>(n=3)                                                        | PPV ≥5% (n=9)                                                                                                                                                                                                                                                                            |
|-----------------------------------------------------------------------------------------------------------------------------------------------------------------------------------------------------------------------------------------------------------------------------------------------------------------------------------------------|---------------------------------------------------------------------------------------------------------------------------------------------------------------------------------------------------------------------------------------------------------------------------------------------------------------|-------------------------------------------------------------------------------------------------------------------------|-------------------------------------------------------------------------------|------------------------------------------------------------------------------------------------------------------------------------------------------------------------------------------------------------------------------------------------------------------------------------------|
| Deep vein thrombosis (NICE)<br>Urinary tract infection (NICE)<br>Chest infection (NICE).<br>Headache (NICE)<br>Fracture (NICE)<br>Back pain (NICE)<br>Loss of appetite (NICE)<br>Bone pain (NICE)<br>Lymphadenopathy (generalised or localised – NICE)<br>Fever (NICE)<br>Visual disturbance or loss (NICE)<br>Gastrointestinal reflux (NICE) | Breast Pain (Moore)<br>Dyspnoea (Moore)<br>Dysuria (Moore)<br>Diarrhoea (Moore)<br>Nausea and/or vomiting (Moore)<br>Constipation (Moore)<br>Fatigue (Moore)<br>Dyspepsia (Moore)<br>Chest pain (Moore)<br>Cough (Moore)<br>vaginal discharge (Moore)<br>Fit / Seizure (NICE)<br>Upper Abdominal pain (NICE). | Abdominal pain (NOS) (Moore)<br>Weight loss (Moore)<br>Hoarseness (Moore)<br>haematemesis (Moore)<br>Distension (Moore) | Change in bowel habit (Moore)<br>Haematuria (Moore)<br>nipple changes (Moore) | Haemoptysis (Moore)<br>Dysphagia (Moore)<br>Jaundice (Moore),<br>Rectal bleeding (Moore)<br>Breast lump/mass (Moore)<br>nipple discharge (Moore)<br>Post-menopausal bleeding (Moore)<br>LUTS (nocturia, frequency, hesitancy, urgency, retention) (Moore)<br>Non-pigmented lesion (NICE) |

\* Symptom allocation based on **Moore et al** (2021) [18] and **NICE** guidelines (NG12) – Evidence available on request.
